# Supplementary material for: Effects of strength training on functional ambulation following knee replacement: a systematic review, meta-analysis, and meta-regression
Source: PubMed Central journal article supplement (PMC10317962; doi:10.1038/s41598-023-37924-1), 2023-07-03

**Effects of strength training on functional ambulation following knee replacement: A systematic review, meta-analysis, and meta-regression**

Jinxiang Wang<sup>1,2</sup>, Ranran Zhu<sup>2</sup>, Xiao-ting Xu<sup>3</sup>, Shuting Liu<sup>2</sup>, Zhenrui Li<sup>1</sup>, Chaoyang Guo<sup>2</sup>, Xuchen Tao<sup>2</sup>, Liang Qian<sup>2</sup>, Ravon Charles<sup>2</sup>, \*Lei Fang<sup>1,2</sup>

<sup>1</sup>Yueyang Hospital of Integrated Traditional Chinese and Western Medicine, Shanghai University of Traditional Chinese Medicine, Shanghai, China

<sup>2</sup>School of Rehabilitation Science, Shanghai University of Traditional Chinese Medicine, Shanghai, China

<sup>3</sup>Institute of TCM International Standardization, Shuguang Hospital Affiliated to Shanghai University of Traditional Chinese Medicine, China

\*Correspondence to: Lei Fang, email: [fanglei586@126.com](mailto:fanglei586@126.com)

Supplementary Table S1 Full search strategy

| Database       | Strategy                                                                                                                                                                                                                                                                                                                                                                                                                                                                           | Outcome |
|----------------|------------------------------------------------------------------------------------------------------------------------------------------------------------------------------------------------------------------------------------------------------------------------------------------------------------------------------------------------------------------------------------------------------------------------------------------------------------------------------------|---------|
| Pubmed         | (((((arthroplasty, knee replacement[MeSH Terms]) OR (knee replacement[Title/Abstract])) OR (knee arthroplasty[Title/Abstract])) OR (Knee Prosthesis[Title/Abstract])) AND (((((((Resistance Training[MeSH Terms]) OR (Strength Training[Title/Abstract])) OR (Weight-Bearing Exercise[Title/Abstract])) OR (eccentric exercise[Title/Abstract])) OR (concentric exercise[Title/Abstract])) OR (isotonic exercise[Title/Abstract])) OR (Weight Lifting Exercise[Title/Abstract])))) | 541     |
| Web of Science | (arthroplasty, knee replacement OR knee replacement OR knee arthroplasty OR Knee Prosthesis) AND (Resistance Training OR Strength Training OR Weight-Bearing Exercise OR eccentric exercise OR concentric exercise OR isotonic exercise OR Weight Lifting Exercise)                                                                                                                                                                                                                | 898     |
| Cochrane       | (arthroplasty, knee replacement OR knee replacement OR knee arthroplasty OR Knee Prosthesis) AND (Resistance Training OR Strength Training OR Weight-Bearing Exercise OR eccentric exercise OR concentric exercise OR isotonic exercise OR Weight Lifting Exercise) in Title Abstract Keyword                                                                                                                                                                                      | 1684    |
| Ovid           | (arthroplasty, knee replacement OR knee replacement OR knee arthroplasty OR Knee Prosthesis) AND (Resistance Training OR Strength Training OR Weight-Bearing Exercise OR eccentric exercise OR concentric exercise OR isotonic exercise OR Weight Lifting Exercise) { Including Limited Related Terms }                                                                                                                                                                            | 3451    |
| Embase         | (arthroplasty, knee replacement OR knee replacement OR knee arthroplasty OR Knee Prosthesis) AND (Resistance Training OR Strength Training OR Weight-Bearing Exercise OR eccentric exercise OR concentric exercise OR isotonic exercise OR Weight Lifting Exercise) ti,ab,kw AND "randomized controlled trail"/de                                                                                                                                                                  | 586     |
| CNKI           | "膝关节置换" AND ("力量" OR "抗阻" OR "渐进性")                                                                                                                                                                                                                                                                                                                                                                                                                                                | 138     |

|              |                                     |     |
|--------------|-------------------------------------|-----|
| WANFANG DATA | “膝关节置换” AND (“力量” OR “抗阻” OR “渐进性”) | 102 |
| VIP          | “膝关节置换” AND (“力量” OR “抗阻” OR “渐进性”) | 48  |

Supplementary Fig. S2 Sensitivity analysis of 6MWT

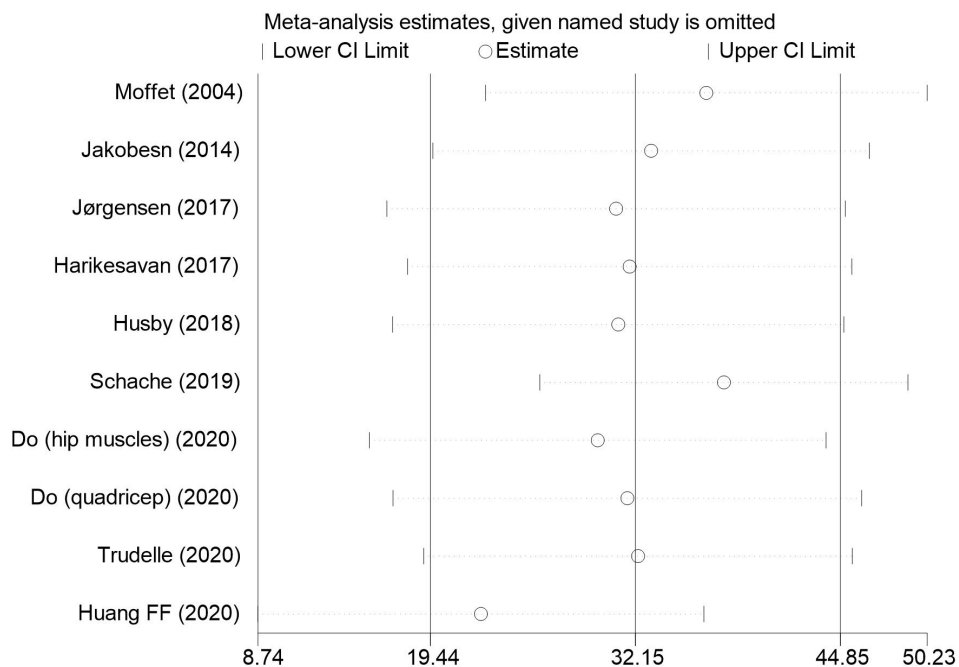

Supplementary Table S3 Sensitivity analysis of 6MWT

| Study omitted           | Estimate | lower 95% CI | upper 95% CI |
|-------------------------|----------|--------------|--------------|
| Moffet (2004)           | 36.54    | 22.85        | 50.23        |
| Jakobesn (2014)         | 33.12    | 19.59        | 46.65        |
| Jørgensen (2017)        | 30.95    | 16.74        | 45.16        |
| Harikesavan (2017)      | 31.79    | 18.01        | 45.56        |
| Husby (2018)            | 31.08    | 17.10        | 45.07        |
| Schache (2019)          | 37.63    | 26.22        | 49.04        |
| Do (hip muscles) (2020) | 29.81    | 15.65        | 43.96        |
| Do (quadricep) (2020)   | 31.65    | 17.12        | 46.17        |
| Trudelle (2020)         | 32.31    | 19.02        | 45.60        |
| Huang FF (2020)         | 22.57    | 8.74         | 36.40        |
| Combined                | 32.15    | 19.44        | 44.85        |

Supplementary Fig. S4 Funnel plot of 6MWT

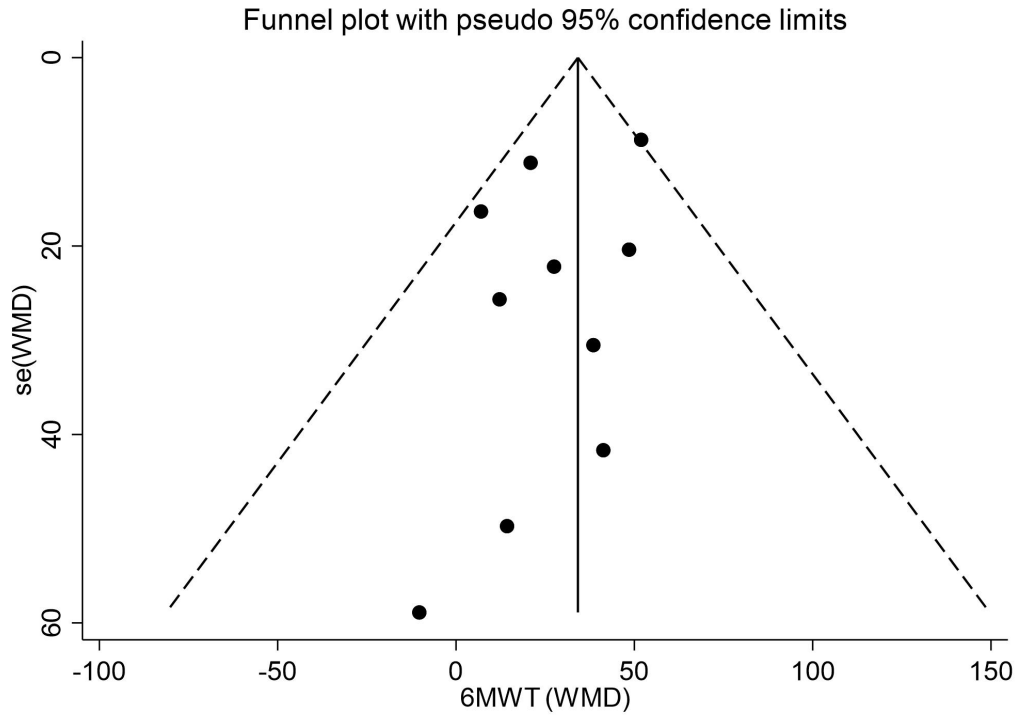

Supplementary Fig. S5 Within group mean difference for strength training (6MWT)

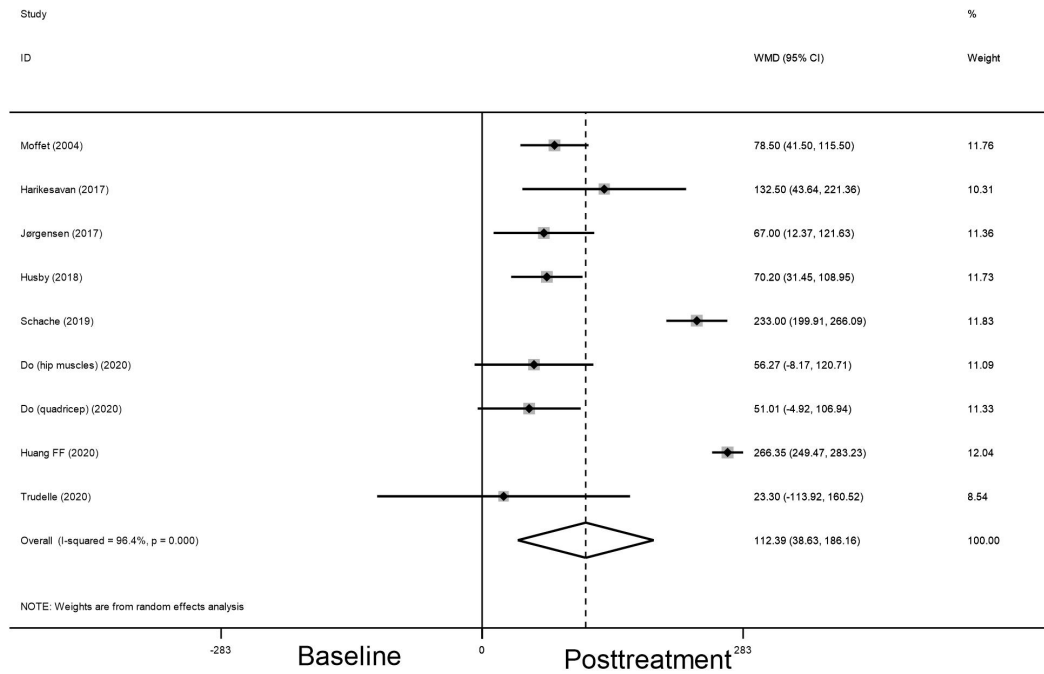

Supplementary Fig. S6 Sensitivity analysis of TUG

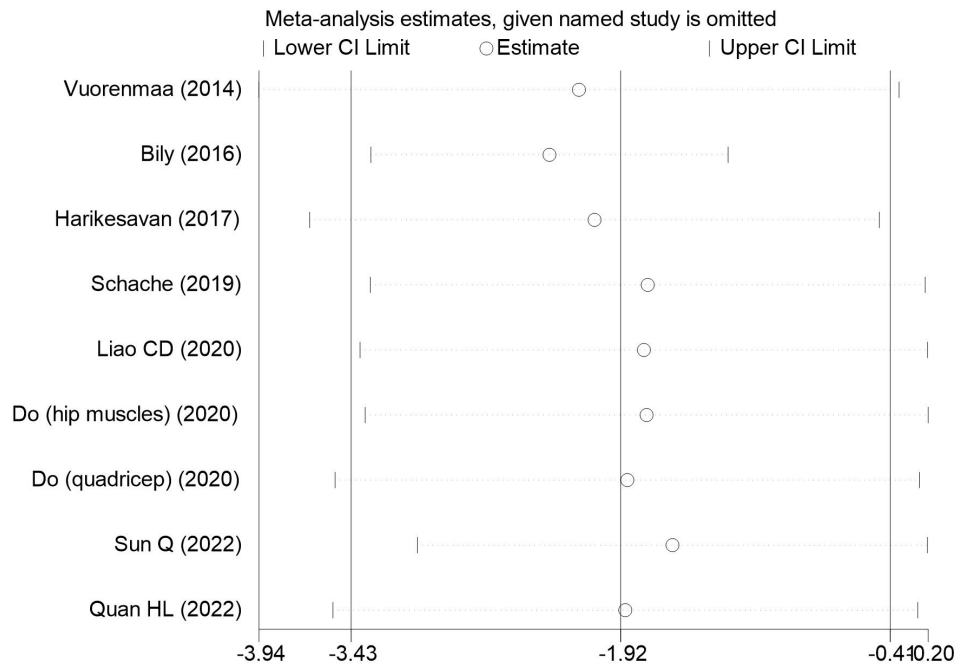

Supplementary Table S7 Sensitivity analysis of TUG

| Study omitted           | Estimate | lower 95% CI | upper 95% CI |
|-------------------------|----------|--------------|--------------|
| Vuorenmaa (2014)        | -2.15    | -3.94        | -0.37        |
| Bily (2016)             | -2.32    | -3.31        | -1.32        |
| Harikesavan (2017)      | -2.07    | -3.66        | -0.48        |
| Schache (2019)          | -1.77    | -3.32        | -0.22        |
| Liao CD (2020)          | -1.79    | -3.38        | -0.21        |
| Do (hip muscles) (2020) | -1.78    | -3.35        | -0.20        |
| Do (quadricep) (2020)   | -1.88    | -3.52        | -0.25        |
| Sun Q (2022)            | -1.63    | -3.05        | -0.21        |
| Quan HL (2022)          | -1.89    | -3.53        | -0.26        |
| Combined                | -1.92    | -3.43        | -0.41        |

Supplementary Fig. S8 Within group mean difference for strength training (TUG)

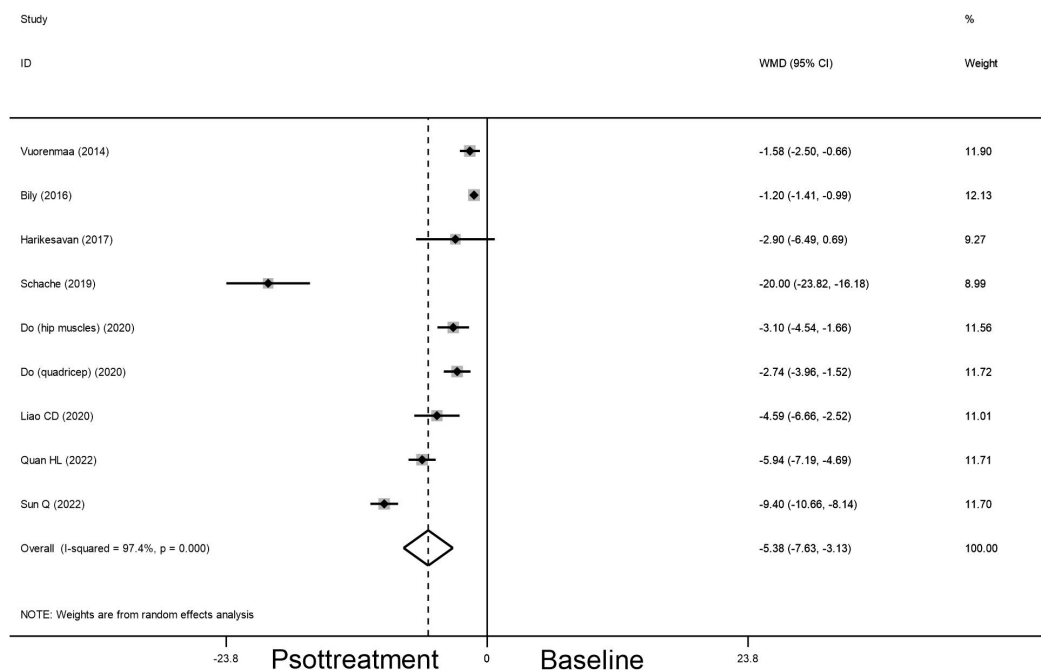

Supplementary Fig. S9 Certainty assessment (6MWT)

| Strength training vs control treatment |                                        |                                                     |                          |                              |                                                                                          |
|----------------------------------------|----------------------------------------|-----------------------------------------------------|--------------------------|------------------------------|------------------------------------------------------------------------------------------|
| Bibliography:                          |                                        |                                                     |                          |                              |                                                                                          |
| Outcomes                               | No of Participants (studies) Follow up | Quality of the evidence (GRADE)                     | Relative effect (95% CI) | Anticipated absolute effects |                                                                                          |
|                                        |                                        |                                                     |                          | Risk with Control 6MWT       | Risk difference with Strength training (95% CI)                                          |
| 6MWT                                   | 535 (10 studies)                       | ⊕⊕⊕⊕<br>MODERATE <sup>1</sup><br>due to imprecision |                          |                              | The mean 6mwt in the intervention groups was <b>32.15 higher</b> (19.44 to 44.85 higher) |

<sup>1</sup>The basis for the assumed risk (e.g. the median control group risk across studies) is provided in footnotes. The corresponding risk (and its 95% confidence interval) is based on the assumed risk in the comparison group and the relative effect of the intervention (and its 95% CI).

CI: Confidence interval;  
GRADE Working Group grades of evidence  
**High quality:** Further research is very unlikely to change our confidence in the estimate of effect.  
**Moderate quality:** Further research is likely to have an important impact on our confidence in the estimate of effect and may change the estimate.  
**Low quality:** Further research is very likely to have an important impact on our confidence in the estimate of effect and is likely to change the estimate.  
**Very low quality:** We are very uncertain about the estimate.

<sup>1</sup> wide 95% CI

Supplementary Fig. S10 Certainty assessment (TUG)

| Strength training vs control treatment |                                        |                                                                 |                          |                              |                                                                                    |
|----------------------------------------|----------------------------------------|-----------------------------------------------------------------|--------------------------|------------------------------|------------------------------------------------------------------------------------|
| Bibliography:                          |                                        |                                                                 |                          |                              |                                                                                    |
| Outcomes                               | No of Participants (studies) Follow up | Quality of the evidence (GRADE)                                 | Relative effect (95% CI) | Anticipated absolute effects |                                                                                    |
|                                        |                                        |                                                                 |                          | Risk with Control            | Risk difference with TUG (95% CI)                                                  |
| TUG                                    | 601 (9 studies)                        | ⊕⊕⊕⊕<br>LOW <sup>1,2</sup><br>due to inconsistency, imprecision |                          |                              | The mean tug in the intervention groups was <b>1.92 lower</b> (3.43 to 0.41 lower) |

<sup>1</sup>The basis for the assumed risk (e.g. the median control group risk across studies) is provided in footnotes. The corresponding risk (and its 95% confidence interval) is based on the assumed risk in the comparison group and the relative effect of the intervention (and its 95% CI).

CI: Confidence interval;  
GRADE Working Group grades of evidence  
**High quality:** Further research is very unlikely to change our confidence in the estimate of effect.  
**Moderate quality:** Further research is likely to have an important impact on our confidence in the estimate of effect and may change the estimate.  
**Low quality:** Further research is very likely to have an important impact on our confidence in the estimate of effect and is likely to change the estimate.  
**Very low quality:** We are very uncertain about the estimate.

<sup>1</sup> I<sup>2</sup> > 50%  
<sup>2</sup> wide 95% CI

domain for downgrading:

risk of bias: over 50% studies were high risk of bias

inconsistency:  $I^2$  over 50%

indirectness: studies included or meta-analysis approaches were irrelevant with the study aim

imprecision: wide 95% confidence interval (cover the minimal important difference)

publication bias: if publication exists

Supplementary Fig. S11 Dose-response relationship between strength training duration and 6MWT

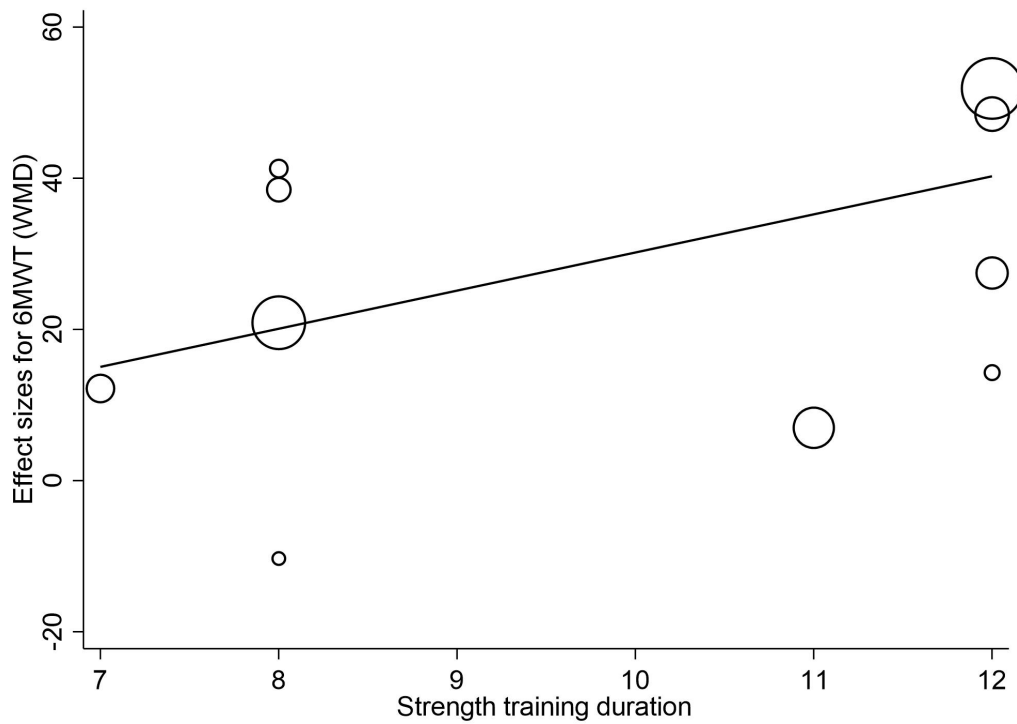

Supplementary Fig. S12 Dose-response relationship between strength training frequency and 6MWT

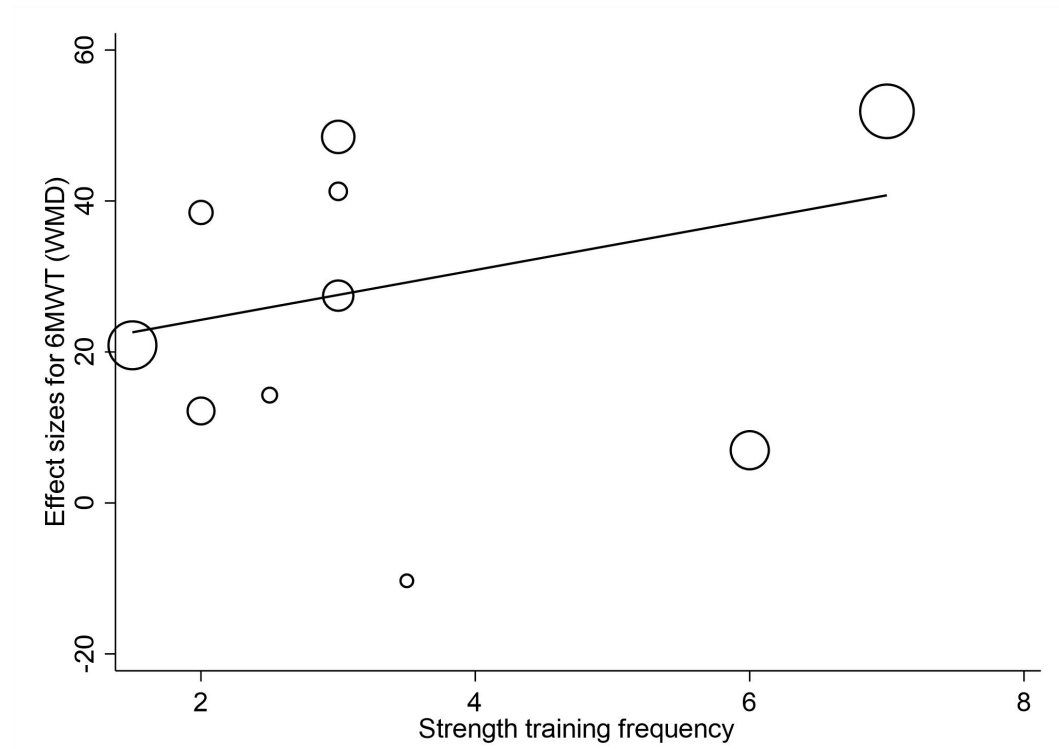

Supplementary Fig. S13 Dose-response relationship between strength training volume and 6MWT

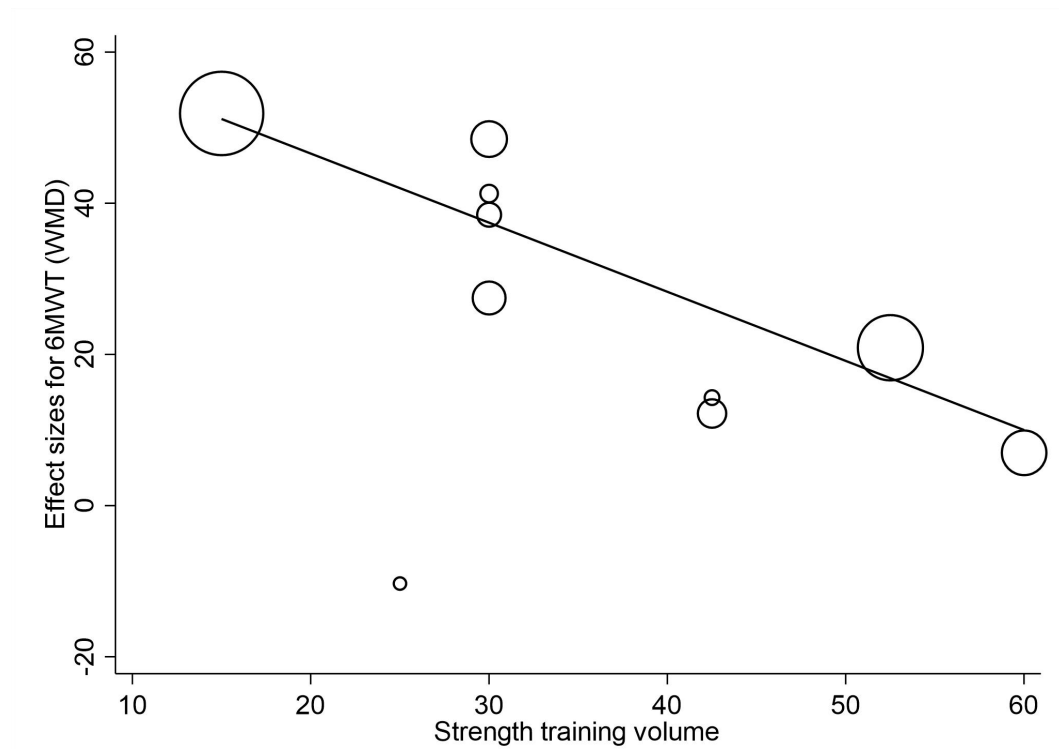

Supplementary Fig. S14 Dose-response relationship between strength training initial time and 6MWT

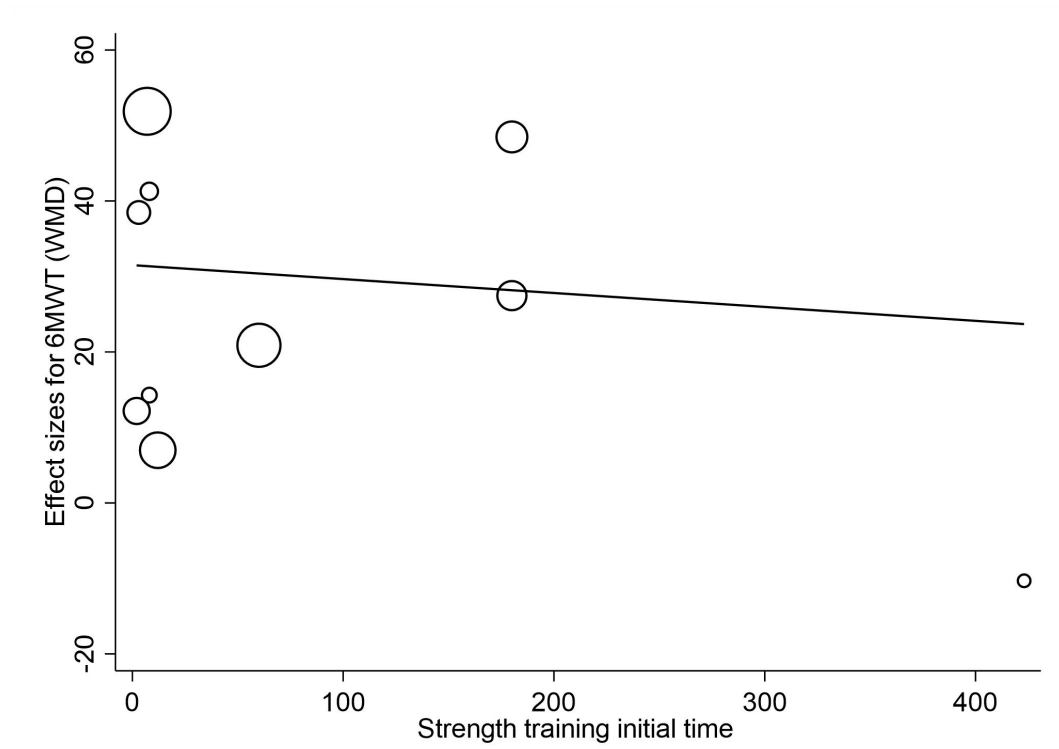

Supplementary Fig. S15 Dose-response relationship between strength training duration and TUG

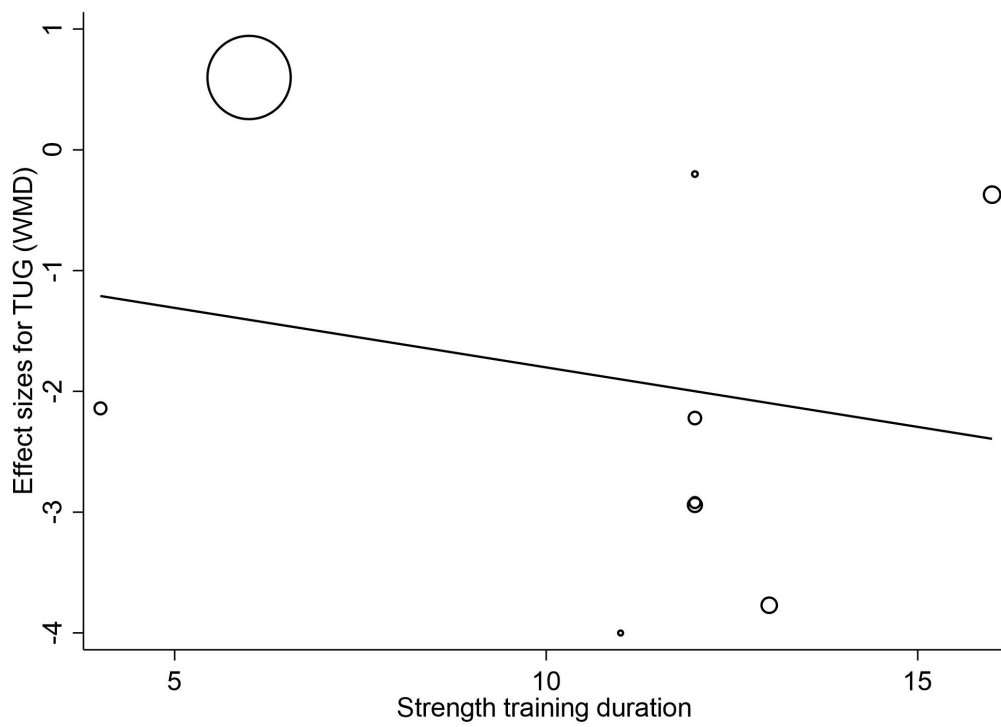

Supplementary Fig. S16 Dose-response relationship between strength training frequency and TUG



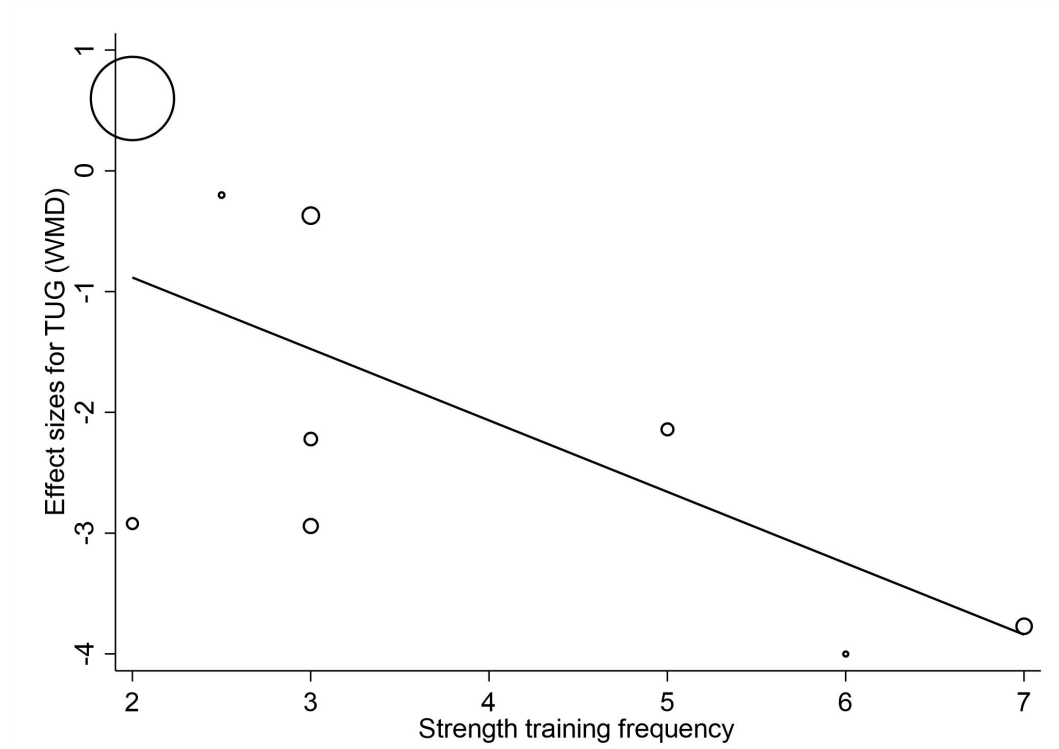

Supplementary Fig. S17 Dose-response relationship between strength training volume and TUG

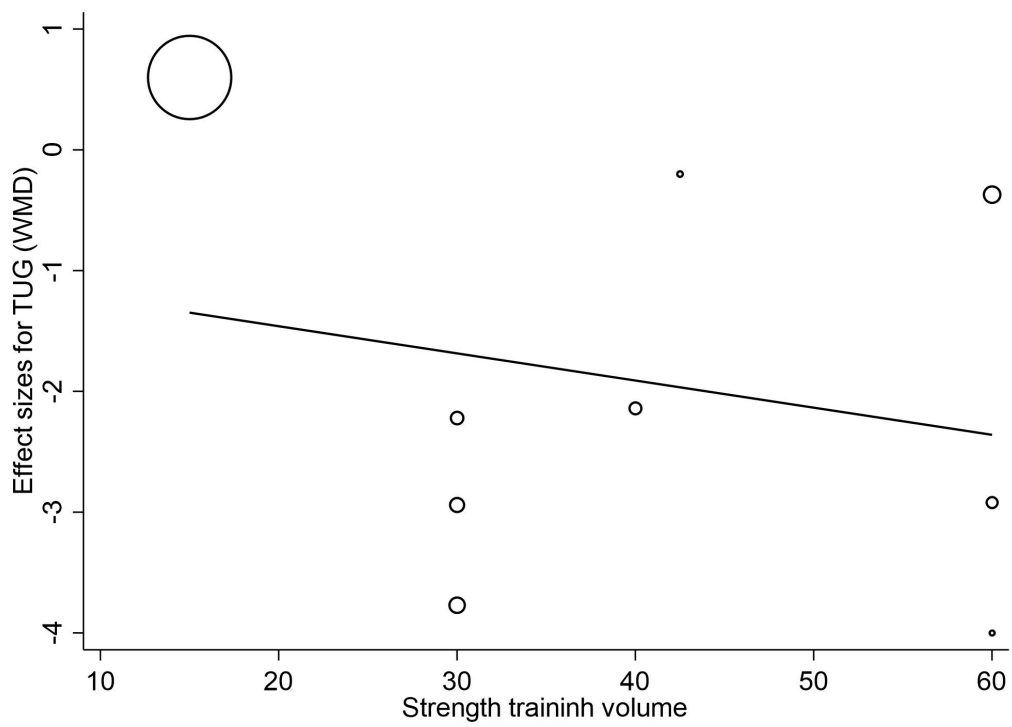

Supplementary Fig. S18 Dose-response relationship between strength training initial time and TUG

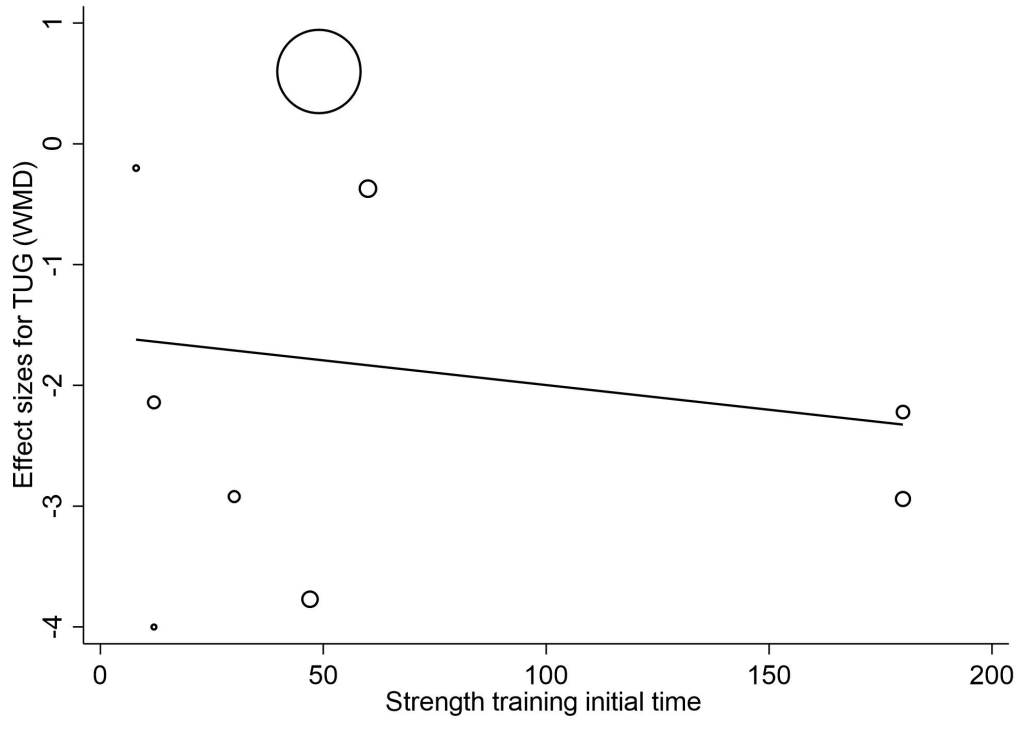

Supplement: 41598_2023_37924_MOESM1_ESM.pdf [file 41598_2023_37924_MOESM1_ESM.pdf]
